# Supplementary material for: High-Throughput Screening Identifies MicroRNAs Regulating Human PCSK9 and Hepatic Low-Density Lipoprotein Receptor Expression
Source: PubMed Central journal article supplement (PMC8310920; doi:10.3389/fcvm.2021.667298), 2021-07-12
Supplement: Data_Sheet_1.pdf [file Data_Sheet_1.pdf]

## Supplementary Material

### High throughput screening identifies microRNAs regulating human PCSK9 and hepatic LDL receptor expression

Coen van Solingen<sup>1</sup>, Scott R. Oldebeken<sup>1</sup>, Alessandro G. Salerno<sup>1,2</sup>, Amarylis C. B. A. Wanschel<sup>1,2</sup>, Kathryn J. Moore<sup>1,3</sup> \*

<sup>1</sup>Leon H. Charney Division of Cardiology, NYU Cardiovascular Research Center, Department of Medicine, New York University School of Medicine. New York, NY, USA 10016.

<sup>2</sup>Current affiliation: University of Miami, Coral Gables, FL USA 33146

<sup>3</sup>Department of Cell Biology, New York University School of Medicine. New York, NY, USA 10016.

**\* Correspondence:**

Kathryn Moore

kathryn.moore@nyulangone.org

|             | miRWalk | MicroT4 | miRanda | miRDB | miRMap | PITA | RNA22 | RNAhybrid | Targetscan | Sum |
|-------------|---------|---------|---------|-------|--------|------|-------|-----------|------------|-----|
| miR-224     |         |         |         |       |        |      |       |           |            | 7   |
| miR-342-5p  |         |         |         |       |        |      |       |           |            | 7   |
| miR-601     |         |         |         |       |        |      |       |           |            | 7   |
| miR-650     |         |         |         |       |        |      |       |           |            | 7   |
| miR-128     |         |         |         |       |        |      |       |           |            | 6   |
| miR-191     |         |         |         |       |        |      |       |           |            | 6   |
| miR-221-5p  |         |         |         |       |        |      |       |           |            | 6   |
| miR-26a     |         |         |         |       |        |      |       |           |            | 6   |
| miR-4419a   |         |         |         |       |        |      |       |           |            | 6   |
| miR-4721    |         |         |         |       |        |      |       |           |            | 6   |
| miR-552     |         |         |         |       |        |      |       |           |            | 6   |
| miR-621     |         |         |         |       |        |      |       |           |            | 6   |
| miR-646     |         |         |         |       |        |      |       |           |            | 6   |
| miR-765     |         |         |         |       |        |      |       |           |            | 6   |
| miR-129*    |         |         |         |       |        |      |       |           |            | 5   |
| miR-335     |         |         |         |       |        |      |       |           |            | 5   |
| miR-561     |         |         |         |       |        |      |       |           |            | 5   |
| miR-609     |         |         |         |       |        |      |       |           |            | 5   |
| miR-15b     |         |         |         |       |        |      |       |           |            | 4   |
| miR-3064    |         |         |         |       |        |      |       |           |            | 4   |
| miR-3165    |         |         |         |       |        |      |       |           |            | 4   |
| miR-3177-5p |         |         |         |       |        |      |       |           |            | 4   |
| miR-363-5p  |         |         |         |       |        |      |       |           |            | 4   |
| miR-4667-5p |         |         |         |       |        |      |       |           |            | 4   |
| miR-4700-5p |         |         |         |       |        |      |       |           |            | 4   |
| miR-4779    |         |         |         |       |        |      |       |           |            | 4   |
| miR-491-5p  |         |         |         |       |        |      |       |           |            | 4   |
| miR-498     |         |         |         |       |        |      |       |           |            | 4   |
| miR-524-3p  |         |         |         |       |        |      |       |           |            | 4   |
| miR-4448    |         |         |         |       |        |      |       |           |            | 3   |
| miR-206     |         |         |         |       |        |      |       |           |            | 2   |
| miR-3689d   |         |         |         |       |        |      |       |           |            | 2   |
| miR-4512    |         |         |         |       |        |      |       |           |            | 2   |
| miR-612     |         |         |         |       |        |      |       |           |            | 2   |
| miR-381     |         |         |         |       |        |      |       |           |            | 1   |
| miR-4655-5p |         |         |         |       |        |      |       |           |            | 1   |
| miR-4790-5p |         |         |         |       |        |      |       |           |            | 1   |
| miR-548ai   |         |         |         |       |        |      |       |           |            | 1   |

**Supplementary Figure I.** Prediction of miRNA binding to the human *PCSK9* 3'-UTR for the top 35 miRNAs identified from the primary screen. Green squares indicate a positive prediction of miRNA binding using the indicated miRNA target prediction algorithms. Candidates were ranked based on the sum of positive predictions of miRNA binding sites in the *PCSK9* 3'-UTR.

Supplementary Table I. Top 100 miRNAs identified from primary screen of human miRNA mimics that repress PCSK9 3'-UTR-luciferase reporter activity

| Rank | Accession Number(s) | Gene Symbol     | Ambion_mirna_id | Ambion_miProd_ID | Mature_Sequence         |
|------|---------------------|-----------------|-----------------|------------------|-------------------------|
| 1    | MIMAT0019721        | hsa-miR-4655-5p | 21783           | MC21783          | CACCGGGGAUGGCAGAGGGUGC  |
| 2    | MIMAT0003277        | hsa-miR-609     | 11618           | MC11618          | AGGGUUUUUCUUCUUCUUCU    |
| 3    | MIMAT0019049        | hsa-miR-4512    | 22380           | MC22380          | CAGGGCCUACUAGUUAUGCCCA  |
| 4    | POS CONTROL         | hsa-miR-224     | POS CONTROL     | POS CONTROL      | UCAAGUACUAGUGUUCUUUAG   |
| 5    | MIMAT0019881        | hsa-miR-4746-3p | 22383           | MC22383          | AGCGGUGUCUCUGCGGGCGGA   |
| 6    | MIMAT0019961        | hsa-miR-4790-5p | 22723           | MC22723          | AUCGUUUUJCCAUUAUUGU     |
| 7    | MIMAT0019008        | hsa-miR-3689d   | 22098           | MC22098          | GGGAGGUGUAUCUACACUCUG   |
| 8    | MIMAT0019024        | hsa-miR-548al   | 21878           | MC21878          | AACGGCAUAGCAGUUUUAUCCA  |
| 9    | MIMAT0018932        | hsa-miR-378f    | 21788           | MC21788          | ACUGGACUUGGAGCAGAAAG    |
| 10   | MIMAT0019215        | hsa-miR-3177-5p | 22218           | MC22218          | UGUUAACACAGGUCGAGCGGCU  |
| 11   | MIMAT0003385        | hsa-miR-363*    | 11353           | MC11353          | CGGGUGGAUCAGUAGCAUUU    |
| 12   | MIMAT0000226        | hsa-miR-196a    | 10068           | MC10068          | UAGGUUUAUUUUAUUGUUGGG   |
| 13   | MIMAT0002807        | hsa-miR-491-5p  | 11479           | MC11479          | AGUGGGGAUCCUUCUAGGAG    |
| 14   | MIMAT0018967        | hsa-miR-4448    | 22317           | MC22317          | GGUUCUUGGUCUAGGGGUUA    |
| 15   | MIMAT0003280        | hsa-miR-612     | 11461           | MC11461          | GCUUGGGCAGGGUUCUAGUUCUU |
| 16   | MIMAT0003215        | hsa-miR-552     | 11431           | MC11431          | AACAGGUGACUGGUUAGACAA   |
| 17   | MIMAT0019796        | hsa-miR-4700-5p | 22042           | MC22042          | UCUGGGGAUGAGGACAGUGUGU  |
| 18   | MIMAT0019728        | hsa-miR-4660    | 22726           | MC22726          | UGGAGUUCUUGGUGAAUUGGAG  |
| 19   | MIMAT0019743        | hsa-miR-4667-5p | 21789           | MC21789          | ACUGGGGAGCAGAAAGGAAACC  |
| 20   | MIMAT0019041        | hsa-miR-4505    | 21694           | MC21694          | AGGCUUGGUCUGGAGCGGA     |
| 21   | MIMAT0019766        | hsa-miR-4681    | 21695           | MC21695          | AACGGGAUAGCAGGUCUUAUCU  |
| 22   | MIMAT0000426        | hsa-miR-132     | 10166           | MC10166          | UAAACAGUCUACAGCCAUGGUCG |
| 23   | MIMAT0019029        | hsa-miR-4494    | 22041           | MC22041          | CCAAGUCUGGUCUAGCAGAGG   |
| 24   | MIMAT0019046        | hsa-miR-4509    | 22384           | MC22384          | ACUAAAGGAUUAUGAAAGUUUU  |
| 25   | MIMAT0019782        | hsa-miR-4691-3p | 21517           | MC21517          | CCAGCCACGGACUGAGUGCAU   |
| 26   | MIMAT0019786        | hsa-miR-4694-5p | 22219           | MC22219          | AGGUUUUAUCCUUAUUAUUGC   |
| 27   | MIMAT0019938        | hsa-miR-4779    | 22573           | MC22573          | UAGGAGGAAUUAUAAAAGCAG   |
| 28   | MIMAT0001541        | hsa-miR-449a    | 11127           | MC11127          | UGGCAUGUUAUUGUUAUGUUGU  |
| 29   | MIMAT0019737        | hsa-miR-4664-5p | 21667           | MC21667          | UGGGGUGCCUCCCGCAAGUU    |
| 30   | MIMAT0000082        | hsa-miR-26a     | 10249           | MC10249          | UUCAAGUUAUCCAGGAUAGGCU  |
| 31   | MIMAT0000687        | hsa-miR-299-3p  | 10448           | MC10448          | UAUUGGGGAUUGAAUCCGCUU   |
| 32   | MIMAT0018992        | hsa-miR-4465    | 22714           | MC22714          | CUCAAGUAGUUGUACAGGGGA   |
| 33   | MIMAT0019357        | hsa-miR-3972    | 21943           | MC21943          | CUGCCAGCCCCUUCAGGGCA    |
| 34   | MIMAT0019715        | hsa-miR-4651    | 22425           | MC22425          | CGGGUGGUGGAGGUCGCGGC    |
| 35   | MIMAT0002804        | hsa-miR-488*    | 10241           | MC10241          | CCCAAGUUAUUGCCACUCUCAA  |
| 36   | MIMAT0003320        | hsa-miR-650     | 11602           | MC11602          | AGGAGGCACGCUUCUACGAC    |
| 37   | MIMAT0004762        | hsa-miR-486-3p  | 12986           | MC12986          | CGGGCAGCUCUAGUACAGGAU   |
| 38   | MIMAT0019735        | hsa-miR-4663    | 22073           | MC22073          | AGGUGAGUCUAGGACUGGCAU   |
| 39   | MIMAT0003309        | hsa-miR-639     | 11645           | MC11645          | AUCGUCGGUUGGCGGCGUUGU   |
| 40   | MIMAT0000073        | hsa-miR-19a     | 10649           | MC10649          | UGUGCAAAUUCUAGCAAAUCUGA |
| 41   | MIMAT0019846        | hsa-miR-4726-3p | 21639           | MC21639          | ACCCAGGUUCCUUCUGCCGCA   |
| 42   | MIMAT0018952        | hsa-miR-4436a   | 22608           | MC22608          | GCAAGCAGGCAAGAGUUGAU    |
| 43   | MIMAT0019844        | hsa-miR-4725-3p | 21937           | MC21937          | UGGGGAAGGCUACUAGUUGGG   |
| 44   | MIMAT0004498        | hsa-miR-25*     | 12401           | MC12401          | AGGCGGAGACUUGGCAUUG     |
| 45   | MIMAT0019711        | hsa-miR-4649-5p | 21525           | MC21525          | UGGGCAGGGGUGGCUUCAGAG   |
| 46   | MIMAT0003219        | hsa-miR-555     | 11635           | MC11635          | AGGUUAAGCUGAAUCUCUGAU   |
| 47   | MIMAT0019958        | hsa-miR-4788    | 21698           | MC21698          | UUAAGGACAGUUAAGGAGGCG   |
| 48   | MIMAT0004568        | hsa-miR-221*    | 12613           | MC12613          | ACUUGGCAUACAAGUUAUUAUU  |
| 49   | MIMAT0003250        | hsa-miR-585     | 11554           | MC11554          | UGGGGUAUCUGUAGUUA       |
| 50   | MIMAT0003335        | hsa-miR-657     | 11637           | MC11637          | GGCAGGUUCCUCCUUCUUAAG   |
| 51   | MIMAT0019077        | hsa-miR-1587    | 21951           | MC21951          | UUGGGCUGGGGUGGUGGUG     |
| 52   | MIMAT0000266        | hsa-miR-205     | 11015           | MC11015          | UCCUUAUUAUCCAGGAGUUGC   |
| 53   | MIMAT0019835        | hsa-miR-4721    | 22385           | MC22385          | UGAGGGUCCAGGUGACGGUGG   |
| 54   | MIMAT0000462        | hsa-miR-206     | 10409           | MC10409          | UGGAAUGUAAGGAAUGUGUGG   |
| 55   | MIMAT0000765        | hsa-miR-335     | 10063           | MC10063          | UCAAGAGCAUUAACGAAAAUUGU |
| 56   | MIMAT0002850        | hsa-miR-524-3p  | 10729           | MC10729          | GAAGGCGUUCUUCUUGGAGU    |
| 57   | MIMAT0002872        | hsa-miR-501-5p  | 10266           | MC10266          | AAUCCUUUGUCCUUGGGUAGGA  |
| 58   | MIMAT0002824        | hsa-miR-498     | 11121           | MC11121          | UUUUAAGCCAGGGGGGCUUUUUC |
| 59   | MIMAT0019218        | hsa-miR-3194-3p | 22083           | MC22083          | AGGUCUGUCUUCUACUGGCAU   |
| 60   | MIMAT0004694        | hsa-miR-342-5p  | 13066           | MC13066          | AGGGGUCUUAUCUGUAUUGA    |
| 61   | MIMAT0019830        | hsa-miR-4717-3p | 21882           | MC21882          | ACACUUGGUGGUCUUGGCGCU   |
| 62   | MIMAT0004697        | hsa-miR-151-5p  | 11537           | MC11537          | UCGAGGAGUCUACAGUUAUGU   |
| 63   | MIMAT0004819        | hsa-miR-671-3p  | 12333           | MC12333          | UCCGGUUCUAGGGUCCACC     |
| 64   | MIMAT0000267        | hsa-miR-210     | 10516           | MC10516          | CUGUGCGUGUACGCGGUGGA    |
| 65   | MIMAT0001412        | hsa-miR-18b     | 10466           | MC10466          | UAAGGUGCAUUAUGGAGUUAUG  |
| 66   | MIMAT0000077        | hsa-miR-22      | 10203           | MC10203          | AAGUCGCAUUGUAGAAUCUGU   |
| 67   | MIMAT0000736        | hsa-miR-381     | 10242           | MC10242          | UAUACAAGGCAAGCUCUUCUGU  |
| 68   | MIMAT0003269        | hsa-miR-601     | 11482           | MC11482          | UGGUCUAGGUAUUGUUGGAGGAG |
| 69   | MIMAT0000417        | hsa-miR-15b     | 10904           | MC10904          | UAGCAGCAUCAUUGUUUUAUUA  |
| 70   | MIMAT0003290        | hsa-miR-621     | 11609           | MC11609          | GGCUAGCAAGCAGGCUUAUCU   |
| 71   | MIMAT0002879        | hsa-miR-507     | 10509           | MC10509          | UUUUGCACUUUUGGAGUGAA    |
| 72   | MIMAT0003225        | hsa-miR-561     | 11540           | MC11540          | CAAGUUUAAGAUUCUUGAAGU   |
| 73   | MIMAT0003316        | hsa-miR-646     | 11379           | MC11379          | AAGCAUCUGUCUUCGAGGC     |
| 74   | MIMAT0019942        | hsa-miR-4781-5p | 22740           | MC22740          | UAGCGGGAUUCCAAUUAUUGG   |
| 75   | MIMAT0003340        | hsa-miR-542-5p  | 13010           | MC13010          | UCGGGUAUCAUAGUACAGAGA   |
| 76   | MIMAT0004548        | hsa-miR-129*    | 12962           | MC12962          | AAGCCUUUACCCAAAAGUAU    |
| 77   | MIMAT0000440        | hsa-miR-191     | 11717           | MC11717          | CAACGGAAUCCAAAGCAGCUG   |
| 78   | MIMAT0003294        | hsa-miR-625     | 12566           | MC12566          | AGGGGAAAGUUUUAUUAUUC    |
| 79   | MIMAT0003945        | hsa-miR-765     | 11892           | MC11892          | UGGAGGAAAGGAAAGGUGAUG   |
| 80   | MIMAT0003215        | hsa-miR-552     | 11431           | MC11431          | AACAGGUGACUGGUUAGACAA   |
| 81   | MIMAT0014996        | hsa-miR-3131    | 16741           | MC16741          | UCGAGGACUGGUGAAAGGCGUU  |
| 82   | MIMAT0012735        | hsa-miR-718     | 16440           | MC16440          | CUUCCGCCCCCGGGCGGCG     |
| 83   | MIMAT0005950        | hsa-miR-1306    | 13206           | MC13206          | ACGUUGGUCUGGUGGUGUG     |
| 84   | MIMAT0014995        | hsa-miR-3130-5p | 17993           | MC17993          | UACCGAGUCUCCGGUGCAGCC   |
| 85   | MIMAT0018931        | hsa-miR-4419a   | 20913           | MC20913          | UGAGGGAGGAGACUJGCA      |
| 86   | MIMAT0015045        | hsa-miR-3170    | 18765           | MC18765          | CUGGGUUCUGAGCAGACAGU    |
| 87   | MIMAT0005940        | hsa-miR-1282    | 13568           | MC13568          | UCGUUUUCCUUUUCUUCUUCU   |
| 88   | MIMAT0015039        | hsa-miR-3165    | 18587           | MC18587          | AGGUGGAUGCAUUGUAGCCUCA  |
| 89   | MIMAT0005920        | hsa-miR-1266    | 13349           | MC13349          | CCUACGGUCUAGAAACAGGGCU  |
| 90   | MIMAT0005915        | hsa-miR-1263    | 13293           | MC13293          | AUGGUUACCCUGGUAUCUAGAGU |
| 91   | MIMAT0016901        | hsa-miR-4271    | 18627           | MC18627          | GGGGGAAAGAAAGGUGGGG     |
| 92   | MIMAT0019859        | hsa-miR-4734    | 20995           | MC20995          | GCUUGGGUCUGGCUACAGGGCG  |
| 93   | MIMAT0019873        | hsa-miR-4742-3p | 20629           | MC20629          | UCUUAUUCUUCUUGCCUGCAG   |
| 94   | MIMAT0019981        | hsa-miR-4802-5p | 20718           | MC20718          | UAUGGAGGUUUCUAGCAUUGU   |
| 95   | MIMAT0018931        | hsa-miR-4419a   | 20913           | MC20913          | UGAGGGAGGAGACUJGCA      |
| 96   | MIMAT0019864        | hsa-miR-3064-5p | 20900           | MC20900          | UCUUGGCUUUGGUGGUGCA     |
| 97   | MIMAT0018359        | hsa-miR-3943    | 19620           | MC19620          | UAGCCCCAGGCUUACUUGGGCG  |
| 98   | MIMAT0019811        | hsa-miR-4709-5p | 20934           | MC20934          | ACAACAGUAGUUCUUCUCAA    |
| 99   | MIMAT0019062        | hsa-miR-4524    | 21326           | MC21326          | AUAGCAGUAGUACUUCUJCA    |
| 100  | MIMAT0019873        | hsa-miR-4742-3p | 20629           | MC20629          | UCUUAUUCUUCUUGCCUGCAG   |
